# Supplementary material
Source: PubMed Central journal article supplement (PMC9202145)
Supplement: NIHMS1804363-supplement-1804363_Sup_Info.pdf [file NIHMS1804363-supplement-1804363_Sup_Info.pdf]

## Supplementary Information

### Gibbin (*AHDC1*) regulates the mesoderm to pattern epithelial development

Ann Collier<sup>1</sup>, Angela Liu<sup>1,2</sup>, Jessica Torkelson<sup>1</sup>, Jillian Pattison<sup>1</sup>, Sadhana Gaddam<sup>1</sup>,  
Hanson Zhen<sup>1</sup>, Tiffany Patel<sup>1</sup>, Kelly McCarthy<sup>1</sup>, Hana Ghanim<sup>1,2</sup>, and Anthony E. Oro<sup>1,2,3</sup>

<sup>1</sup> Program in Epithelial Biology and <sup>2</sup>Stem Cell Biology and Regenerative Medicine  
Graduate Program

Stanford University, Stanford, CA, USA 94305

<sup>3</sup> Correspondence to: [Oro@stanford.edu](mailto:Oro@stanford.edu)

## **Table of Contents**

|                                                                                                                                                   |                            |
|---------------------------------------------------------------------------------------------------------------------------------------------------|----------------------------|
| <b>Supplementary Figure 1</b> .....                                                                                                               | <b>page 3</b>              |
| Uncropped immunoblots from all figures.                                                                                                           |                            |
| <b>Supplementary Figure 2</b> .....                                                                                                               | <b>page 4</b>              |
| Gating strategy for fluorescence associated cell sorting (FACS).                                                                                  |                            |
| <b>Supplementary Table 1</b> .....                                                                                                                | <b>separate Excel file</b> |
| A list of differentially expressed genes and adjusted p-values from RNA-seq experiments, as well as a list of nearest genes from Gibbin ChIP-seq. |                            |
| <b>Supplementary Table 2</b> .....                                                                                                                | <b>separate Excel file</b> |
| A list of SAINT scores for all Gibbin and GATA3 BASU experiments.                                                                                 |                            |
| <b>Supplementary Table 3</b> .....                                                                                                                | <b>separate Excel file</b> |
| PCR primers and sgRNA sequences used in this study.                                                                                               |                            |

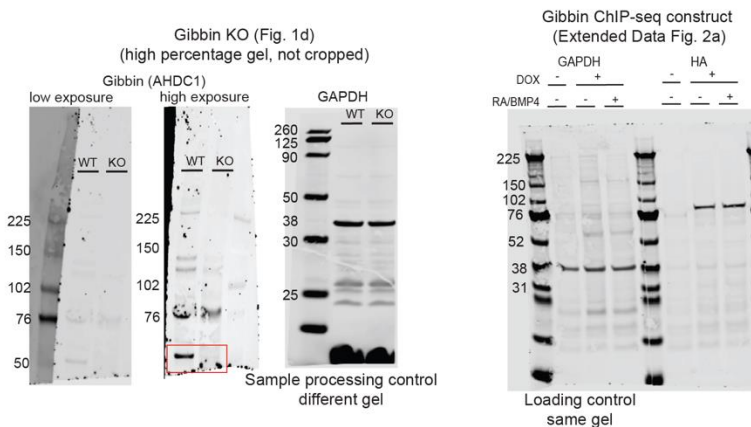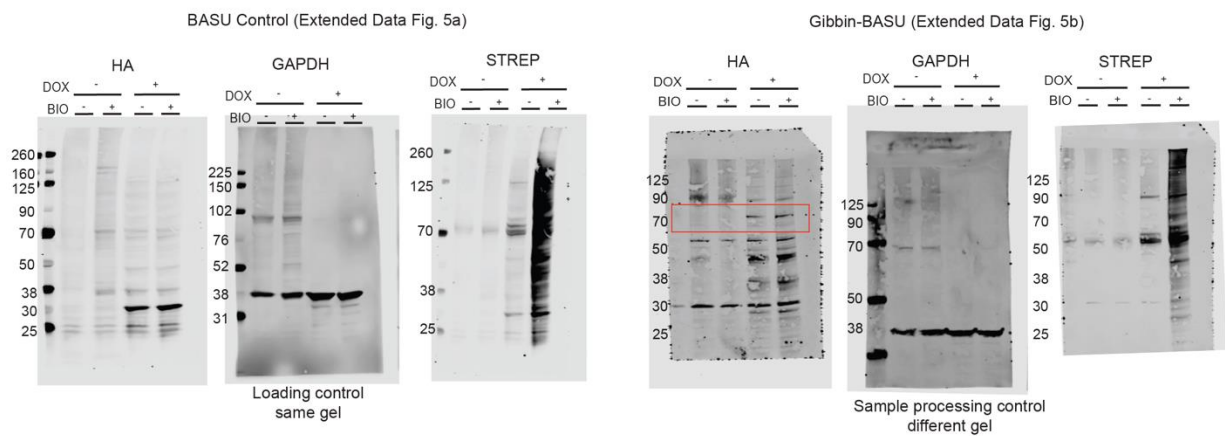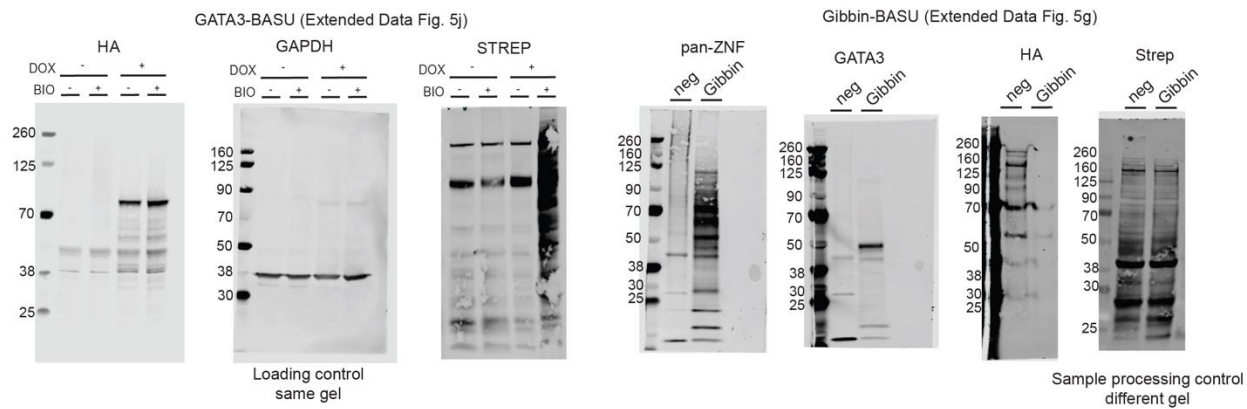

**a** Unstained control

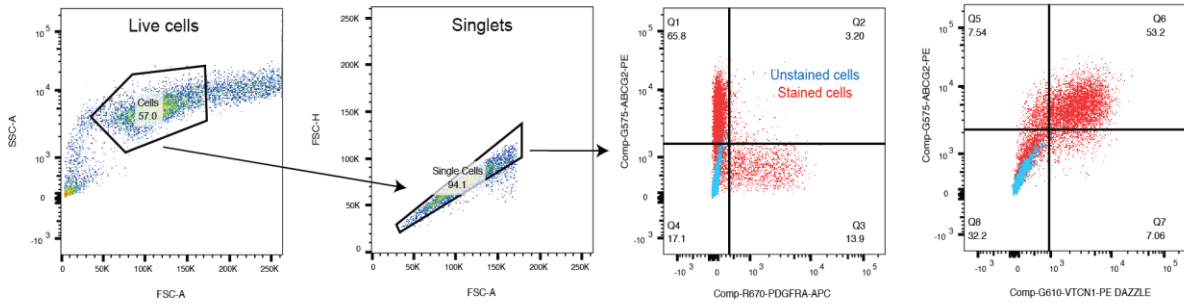

**b** Stained samples (ABCG2+VTCN1+PDGFRA)

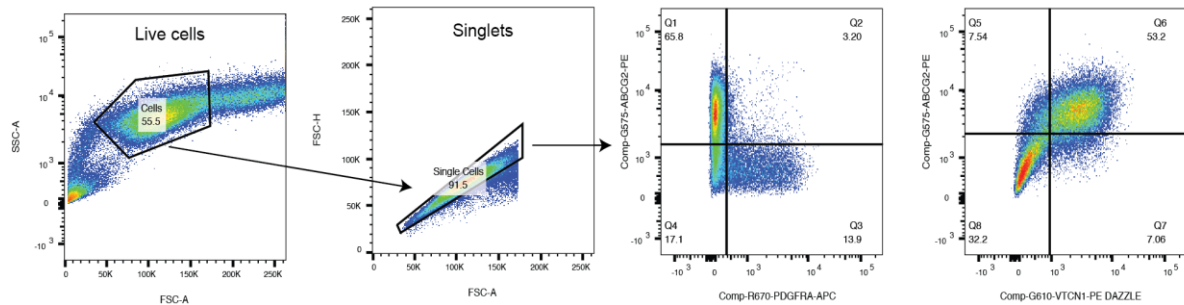

**Supplementary Figure 2: Gating strategy for FACS sorting of surface ectoderm and mesoderm.** For both unstained (a) and stained (b) samples, cells were first sorted for live cells and then for singlets. Negative control gates were applied to antibody-stained samples to set a threshold for positive vs negative staining. Stained cells were then sorted into ABCG2-/PDGFRA+ mesoderm or ABCG2+/VTCN1+ surface ectoderm.
